# Supplementary figures and images for: An acentric parallel interpenetrated dual-ligand zinc coordination polymer from an in situ terminal-to-internal alkene rearrangement
Source: Royal Society of Chemistry journal article supplement (doi:10.1039/b809255a), 2008-01-01

Figure S1. TGA trace of **1**.

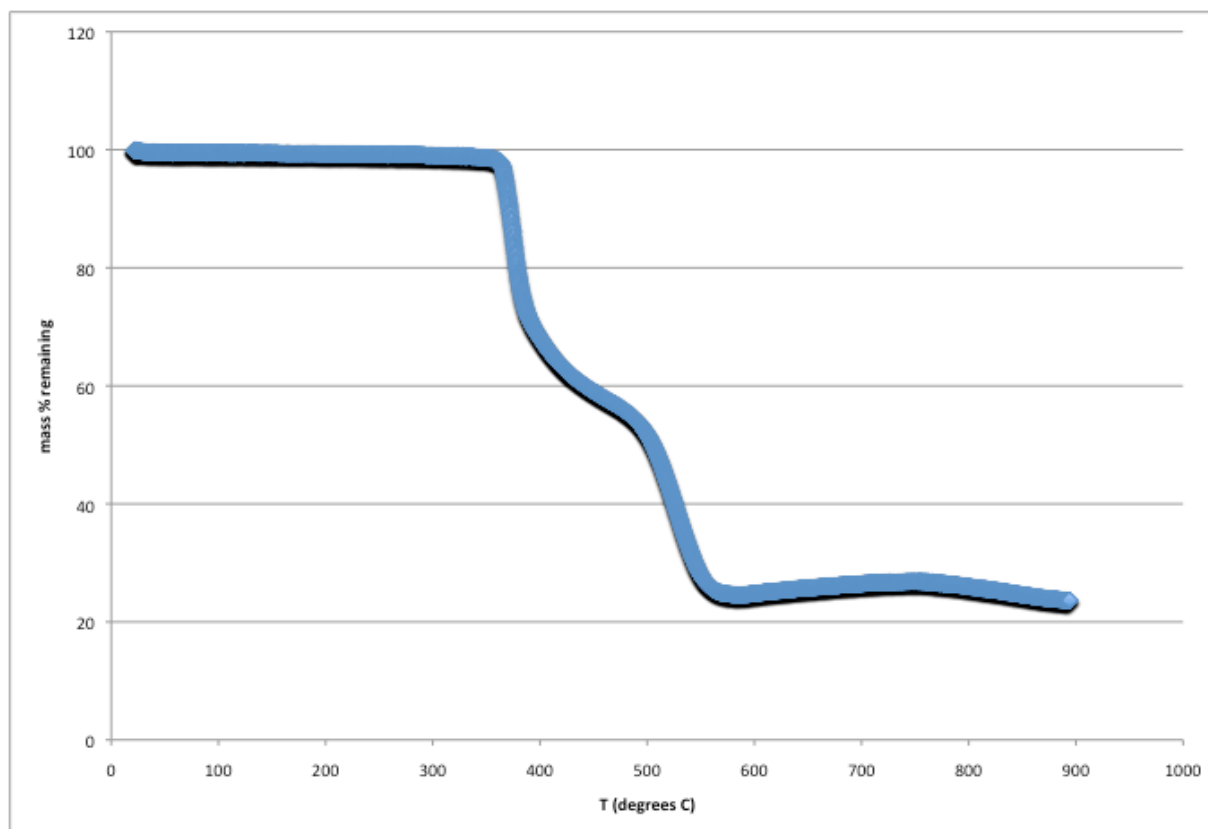

Supplement: b809255a.pdf [file b809255a.pdf]
